# Supplementary material for: Role of cation–anion cooperation in the selective synthesis of glycidol from glycerol using DABCO–DMC ionic liquid as catalyst
Source: Royal Society of Chemistry journal article supplement (doi:10.1039/c4ra04290e), 2014-07-14

## Electronic supplementary information

### Role of cation-anion in selective synthesis of glycidol from glycerol using DABCO-DMC ionic liquid as catalyst

Mudassir K Munshi, Swapna M Gade, Vilas H Rane and Ashutosh A Kelkar<sup>1</sup>

Chemical Engineering and Process Development Division, National Chemical Laboratory, Pune. 411008 India

### Content

| Instrument                                       | Page   |
|--------------------------------------------------|--------|
| Instrument details                               | Page 2 |
| <sup>13</sup> C NMR Spectra                      | Page 2 |
| <sup>1</sup> H- <sup>13</sup> C HSQC NMR Spectra | Page 3 |
| <sup>1</sup> H- <sup>13</sup> C HMBC NMR Spectra | Page 3 |
| TGA of ionic liquid                              | Page 3 |

---

1 : Corresponding Author: Fax +91 20 25902621; Tel : +91 20 25902544 ; E-mail: [aa.kelkar@ncl.res.in](mailto:aa.kelkar@ncl.res.in)

## Instruments:

NMR Spectra were recorded on a Bruker Avance 500 and 400 wide bore spectrometer equipped with a superconducting magnet with a field of 9.4 T by using 5 mm tubes in D<sub>2</sub>O as a solvent. <sup>15</sup>N NMR chemical shifts in parts per million (ppm) were reported with reference to liquid NH<sub>3</sub>. Thermal analysis (TG-DTA) of the ionic liquid was conducted using a Pyris Diamond TGA analyzer with a heating rate of 10 °C min<sup>-1</sup> under nitrogen atmosphere. And melting point was measured on melting point apparatus.

**Figure 1:** <sup>13</sup>C NMR spectra of ionic liquid

A: <sup>13</sup>C NMR DEPT

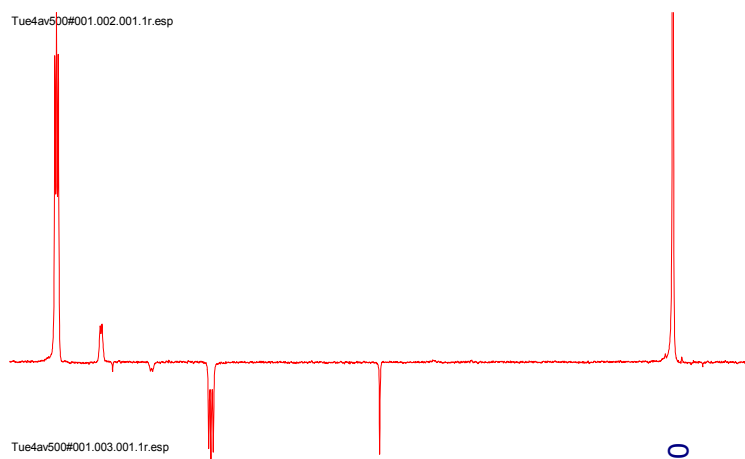

B: <sup>13</sup>C NMR

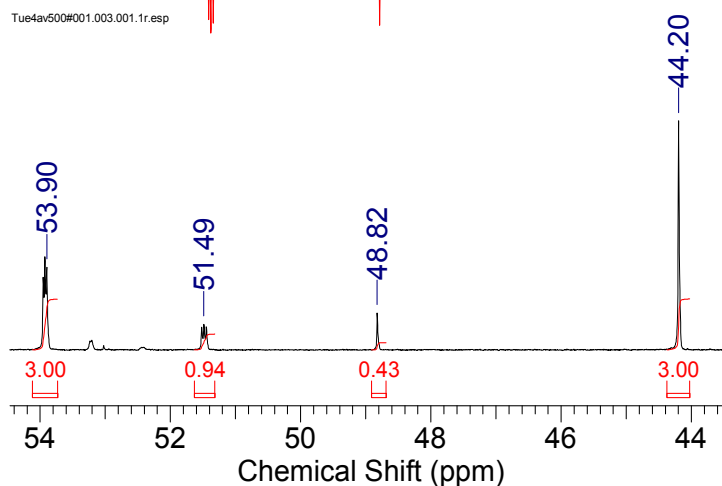

Note: The text "Tue3av400#002.001.001.1r.esp" is the file name that inherently comes with the ACD software used for NMR data interpretation.

**Figure 2:**  $^1\text{H}$ - $^{13}\text{C}$  HSQC NMR spectra of ionic liquid

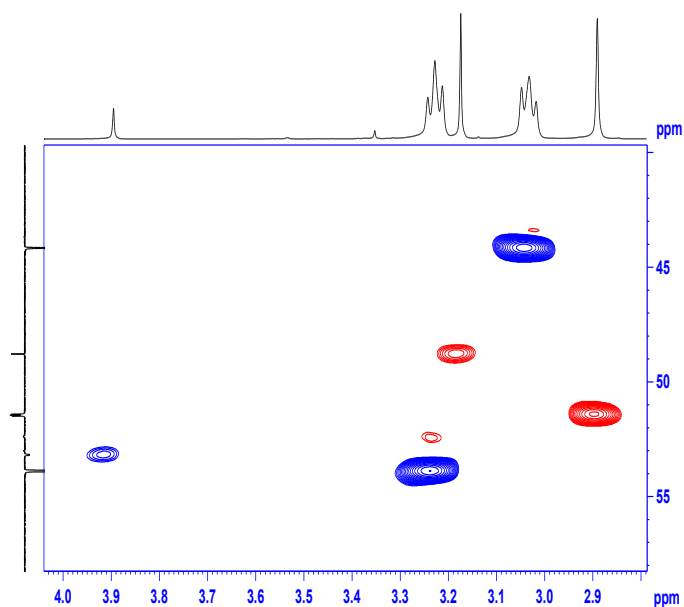

**Figure 3:**  $^1\text{H}$ - $^{13}\text{C}$  HMBC NMR spectra of ionic liquid

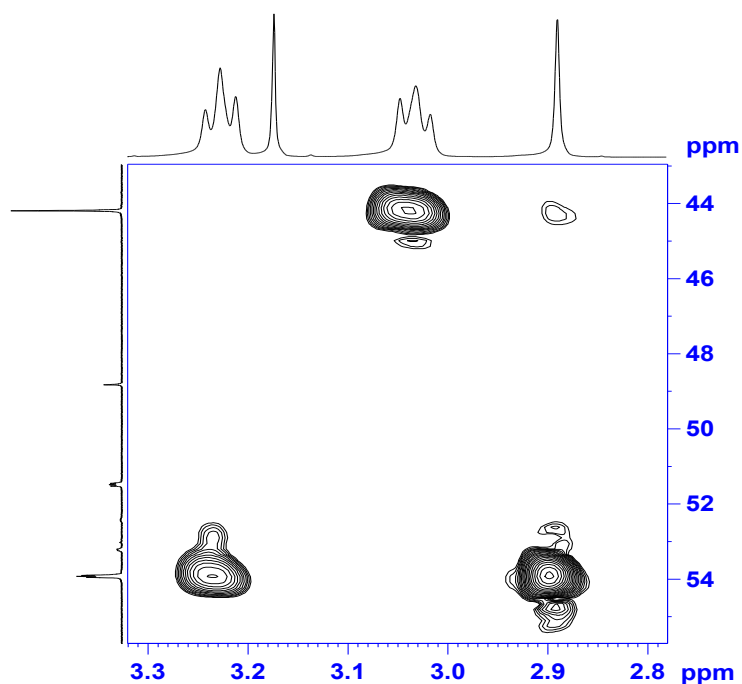

Key correlations observed in  $^1\text{H}$ - $^{13}\text{C}$  HSQC (Figure 2) are:  $\delta\text{C}$  44.20/ $\delta\text{H}$  3.09,  $\delta\text{C}$  48.82/ $\delta\text{H}$  3.16,  $\delta\text{C}$  51.49/ $\delta\text{H}$  2.95,  $\delta\text{C}$  53.90/ $\delta\text{H}$  3.29 and those observed in  $^1\text{H}$ - $^{13}\text{C}$  HMBC (Figure 3) are:  $\delta\text{C}$  53.90/ $\delta\text{H}$  3.29 (observed in  $^1\text{H}$ - $^{13}\text{C}$  HSQC) along with a new long range correlation of  $\delta\text{C}$  53.90/ $\delta\text{H}$  2.95. The observed correlations establish the presence of N- $\text{CH}_3$  unit in the ionic liquid synthesized.

**Figure 4:** TGA analysis of the ionic liquid

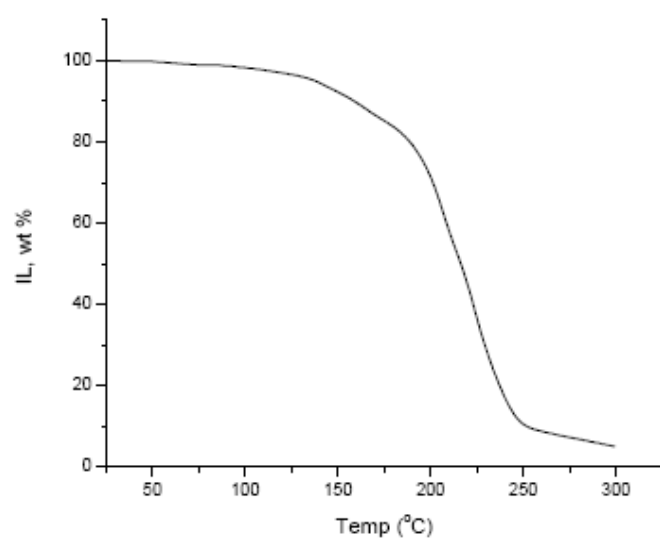

Supplement: c4ra04290e1.pdf [file c4ra04290e1.pdf]
